# Supplementary material for: Catalytic asymmetric synthesis of the alkaloid (+)-myrtine
Source: Royal Society of Chemistry journal article supplement (doi:10.1039/b807575a), 2008-01-01
Supplement: b807575a.pdf [file b807575a.pdf]

## Experimental

**General Methods.** All reactions were performed in oven or flame dried glassware under an inert atmosphere of N<sub>2</sub> or argon. Conjugate additions were carried out using standard Schlenk techniques. Toluene, THF and diethyl ether were distilled from sodium; hexane and CH<sub>2</sub>Cl<sub>2</sub> from CaH<sub>2</sub>. Dialkylzinc reagents: Me<sub>2</sub>Zn (2M in toluene), Et<sub>2</sub>Zn (1M in hexane) and *i*-Pr<sub>2</sub>Zn (1M in toluene) were purchased from Aldrich, Bu<sub>2</sub>Zn (1M in heptane) was purchased from Fluka. Me<sub>3</sub>Al (1 M in heptane) was purchased from Aldrich. Thin-layer chromatography (TLC) was performed on Merck silica gel 60 TLC-plates F254 and visualized using UV irradiation or phosphomolybdic acid. Flash chromatography was carried out on silica gel (Aldrich, 230 – 400 mesh). <sup>1</sup>H NMR spectra were recorded at 300 or 400 MHz with CDCl<sub>3</sub> as solvent, <sup>13</sup>C NMR spectra were recorded at 50 or 100 MHz in CDCl<sub>3</sub> (Varian spectrometers). Chemical shifts were determined relative to the residual solvent peaks (CHCl<sub>3</sub>, δ = 7.26 ppm for hydrogen atoms, δ = 77.0 for carbon atoms). Optical rotations were recorded using a Schmidt+Haensch Polartronic MH8 instrument at 589 nm. Gas chromatography was performed using a Hewlett-Packard HP 6890 Series GC System with flame ionization detector on chiral columns and HPLC on Shimadzu LC-10AD VP instrument equipped with 6 parallel normal phase chiral columns, using a diode array detector. Mass spectra were recorded on an JEOL JMS-600H mass spectrometer.

### 1-*t*-Butoxycarbonyl-2,3-dehydro-4-piperidone (**2**).<sup>1</sup>

4-Methoxypyridine (0.50 mL, 5.0 mmol) was dissolved in *i*-PrOH (10 mL) and cooled to -15 °C (ice-methanol). K(*i*-PrO)<sub>3</sub>BH<sup>2</sup> (10 mL, 10 mmol, 1M in THF) was added to this solution followed by Boc<sub>2</sub>O (1.20 g, 5.5 mmol) in Et<sub>2</sub>O (3 mL). The resulting mixture was stirred for 1 h at -15 °C and then 10% aq. citric acid (20 mL) was added and the stirring continued for 10 min at r.t. The solution was diluted with Et<sub>2</sub>O, phases were separated and the aqueous phase extracted with Et<sub>2</sub>O. The combined organic extracts were washed with brine, dried (MgSO<sub>4</sub>) and concentrated. The crude product was purified by flash chromatography (heptane/AcOEt=2:1) to give 409 mg (41%) of **2** as a white solid. M.p. 53-54°C. δ<sub>H</sub>(300 MHz, CDCl<sub>3</sub>) = 7.80 (d, *J* = 5.9 Hz, 1H), 5.29 (d, *J* = 8.1 Hz, 1H), 3.96 (t, *J*=7.1 Hz, 2H), 2.53 (t, *J*=7.1 Hz, 2H), 1.53 (s, 9H). δ<sub>C</sub>(50 MHz, CDCl<sub>3</sub>) = 193.6, 144.0, 106.72, 83.5, 42.3, 41.2, 35.7, 28.0. Elem. anal. found C, 60.90; H, 7.72; N, 7.13% C<sub>10</sub>H<sub>15</sub>NO<sub>3</sub> requires C, 60.90; H, 7.67; N, 7.10%. *m/z* (EI) 197.1058 (C<sub>10</sub>H<sub>15</sub>NO<sub>3</sub> requires 197.1052).

### *tert*-Butyl 2-methyl-4-oxopiperidine-1-carboxylate (**3**).

Cu(OTf)<sub>2</sub> (180 mg, 0.5 mmol) and ligand (*S,R*)-**L1** (1 mmol) were dissolved in anhydrous toluene (40 mL) and stirred for 40 min at r.t. To this solution 1 mmol of dry Et<sub>2</sub>O was added, followed by a solution of substrate (10 mmol) in toluene (60 mL) and the mixture cooled to -50°C. A solution of Me<sub>3</sub>Al (20 mmol) was added dropwise and the reaction mixture was stirred overnight. The reaction was stopped after 16 h at 80% conversion. The reaction mixture was quenched with sat. aq. NH<sub>4</sub>Cl and extracted with Et<sub>2</sub>O (3x). The combined organic extracts were washed with brine, dried (MgSO<sub>4</sub>) and concentrated. The crude product was purified by flash chromatography (SiO<sub>2</sub>; EtOAc / pentane 25:75) affording compound **3** (1.55 g, 73%) as a white solid. Mp = 57.7 °C. GC on CP Chiralsil Dex CB column, 25m × 0.25mm × 0.25 μm, He-flow: 1mL/min, oven temp.: 120 °C, init., time: 10 min, rate: 1 °C/min, final temp.: 150 °C, t<sub>R</sub> = 23.5 min (minor), t<sub>R</sub> = 23.9 min (major). [α]<sub>D</sub> -18.6 (c 2.01 in CHCl<sub>3</sub>) for 96% ee. δ<sub>H</sub>(300 MHz, CDCl<sub>3</sub>) 4.67-4.65 (m, 1H), 4.21-4.15 (m, 1H), 3.31-3.21 (m, 1H), 2.62 (dd, *J* = 14.4 Hz, 6.7 Hz, 1H), 2.48-2.37 (m, 1H), 2.30-2.17 (m, 2H), 1.43 (s, 9H), 1.12 (d, *J* = 6.9 Hz, 3H) ppm. δ<sub>C</sub>(50 MHz, CDCl<sub>3</sub>) = 208.4, 154.4, 80.3, 47.9, 46.6, 4.06, 38.3, 28.4, 18.9 ppm. *m/z* (EI) 213.13836 (C<sub>11</sub>H<sub>19</sub>NO<sub>3</sub> requires 213.13647).

***tert*-Butyl 7-methyl-1,4-dioxo-8-azaspiro[4.5]decane-8-carboxylate (4).<sup>3</sup>**

Compound **3** (620 mg; 2.9 mmol) was dissolved in toluene (6 mL). Ethylene glycol (0.48 mL; 8.7 mmol) and *p*-toluenesulfonic acid (270 mg; 1.45 mmol) were added and the reaction mixture was heated at reflux overnight in the presence of molecular sieves (3 Å). After cooling down to rt, the molecular sieves were removed by filtration and the reaction mixture was poured in a saturated NaHCO<sub>3</sub> aqueous solution. The aqueous phase was extracted with Et<sub>2</sub>O (2 × 10 mL), and the combined organic extracts were washed with brine, dried over Na<sub>2</sub>SO<sub>4</sub> and concentrated *in vacuo*. Purification by column chromatography (SiO<sub>2</sub>; EtOAc / pentane 10:90) afforded compound **4** (447 mg, 60%) as a colorless oil and the remaining starting material. [ $\alpha$ ]<sub>D</sub> -28.5 (c 0.92 in CHCl<sub>3</sub>), 96% ee.  $\delta_H$ (400 MHz, CDCl<sub>3</sub>) 4.44-4.39 (m, 1H), 3.97-3.84 (m, 2a), 3.05-2.98 (m, 1H), 1.81 (dd, *J* = 13.6 Hz, 6.6 Hz, 1H), 1.62-1.52 (m, 2a), 1.40 (s, 9H), 1.17 (d, *J* = 7.1 Hz, 3H) ppm.  $\delta_C$ (50 MHz, CDCl<sub>3</sub>) 154.6, 107.3, 79.4, 64.6, 63.7, 46.5, 38.3, 36.7, 34.5, 28.4, 17.4 ppm. *m/z* (EI) 257.16269 (C<sub>13</sub>H<sub>23</sub>NO<sub>4</sub> requires 257.16335).

**General procedure A for the lithiation.<sup>3</sup>**

TMEDA (0.090 mL; 0.6 mmol) was added to a solution of compound **4** (64.2 mg; 0.25 mmol) in Et<sub>2</sub>O (4 mL). The resulting solution was cooled to -78 °C and a solution of *s*-BuLi (1.3 M in cyclohexane, 0.46 mL; 0.6 mmol) was added. The reaction mixture was stirred at -78 °C. After 3 h a solution of the electrophile (0.6 mmol) in Et<sub>2</sub>O (1 mL) was added. The reaction mixture was allowed to slowly warm up to rt. After stirring overnight the mixture was poured in H<sub>2</sub>O (5 mL). The water layer was extracted with Et<sub>2</sub>O (2 × 10 mL) and the combined organic phases were washed with brine, dried over Na<sub>2</sub>SO<sub>4</sub> and concentrated *in vacuo*.

**General procedure B for the lithiation.<sup>4</sup>**

TMEDA (0.18 mL; 1.2 mmol) was added to a solution of compound **4** (128.5 mg; 0.5 mmol) in Et<sub>2</sub>O (9 mL). The resulting solution was cooled to -78 °C and a solution of *s*-BuLi (1.3 M in cyclohexane, 0.92 mL; 1.2 mmol) was added. The reaction mixture was stirred at -78 °C. After 3 h a solution in THF (3.5 mL) of the copper complex [CuCN·2LiCl], freshly prepared from CuCN (107 mg; 1.2 mmol) and LiCl (100 mg; 2.4 mmol), was added. The reaction mixture was warmed to -50 °C and stirred at this temperature for 30 min. Then, the temperature was brought once again to -78 °C and a solution of the electrophile (1.2 mmol) in Et<sub>2</sub>O (1 mL) was added. The reaction mixture was allowed to slowly warm up to rt. After stirring overnight the mixture was poured in H<sub>2</sub>O (5 mL). The water layer was extracted with Et<sub>2</sub>O (2 × 10 mL) and the combined organic phases were washed with brine, dried over Na<sub>2</sub>SO<sub>4</sub> and concentrated *in vacuo*.

**(7*R*,9*R*)-*tert*-Butyl 7,9-dimethyl-1,4-dioxo-8-azaspiro[4.5]decane-8-carboxylate (5).<sup>3</sup>**

From procedure A. Purification by column chromatography (SiO<sub>2</sub>; EtOAc / pentane 1:9) afforded compound **5** (48 mg, 71%) as a colorless oil. *R*<sub>f</sub> = 0.3. [ $\alpha$ ]<sub>D</sub> +4.6 (c 0.57 in CHCl<sub>3</sub>), 96% ee and dr 95:5.  $\delta_H$ (400 MHz, CDCl<sub>3</sub>) 4.10-4.05 (m, 2H), 3.98-3.92 (m, 2H), 3.88-3.82 (m, 2H), 2.20 (dd, *J* = 14.7 Hz, 5.5 Hz, 2H), 1.82 (dd, *J* = 14.7 Hz, 3.0 Hz, 2H), 1.45 (s, 9H), 1.25 (d, *J* = 6.9 Hz, 6H) ppm.  $\delta_C$  (50 MHz, CDCl<sub>3</sub>) 154.8, 106.4, 79.1, 63.7, 46.0, 39.2, 28.5, 20.9 ppm. *m/z* (EI) 271.1780 (C<sub>12</sub>H<sub>25</sub>NO<sub>4</sub> requires 271.1784).

**(7*R*,9*R*)-*tert*-Butyl 7-methyl-9-(trimethylsilyl)-1,4-dioxo-8-azaspiro[4.5]decane-8-carboxylate (6).**

From procedure A. Purification by column chromatography (SiO<sub>2</sub>; EtOAc / pentane 5:95) afforded compound **6** (61 mg, 74%) as a colorless oil. *R*<sub>f</sub> = 0.7. [ $\alpha$ ]<sub>D</sub> -13.2 (c 0.55 in CHCl<sub>3</sub>), 96% ee and dr 96:4.  $\delta_H$ (400 MHz, CDCl<sub>3</sub>) 4.46-4.38 (m, 1H), 3.98-3.87 (m, 2a), 2.64 (dd, *J* = 12.6 Hz, 2.6 Hz, 1H), 1.80-1.75 (m, 1H), 1.64-1.52 (m, 3H), 1.41 (s, 9H), 1.24 (d, *J* = 7.1 Hz, 3H), 0.05 (s,

9H) ppm.  $\delta_C$ (50 MHz, CDCl<sub>3</sub>) 155.0, 108.0, 79.1, 64.4, 63.7, 48.1, 39.6, 38.8, 35.8, 28.4, 18.1, -0.5 ppm.  $m/z$  (CI): 330 (M+H)<sup>+</sup>.  $m/z$  (EI) 314.1778 (M-CH<sub>3</sub>, C<sub>15</sub>H<sub>28</sub>NO<sub>4</sub>Si requires 314.1788).

**(7S,9R)-tert-Butyl 7-formyl-9-methyl-1,4-dioxo-8-azaspiro[4.5]decane-8-carboxylate (7).**

From procedure A. Purification by column chromatography (SiO<sub>2</sub>; EtOAc / pentane 2:8) afforded compound **7** (40 mg, 56%) as a colorless oil. R<sub>f</sub> = 0.5.  $[\alpha]_D$  -19.6 (c 0.58 in CHCl<sub>3</sub>), 96% ee and dr 1:1.  $\delta_H$ (400 MHz, CDCl<sub>3</sub>) mixture of the two diastereoisomers 9.61 (d,  $J$  = 1.0 Hz, 1H), 9.44 (d,  $J$  = 2.1 Hz, 1H), 4.65-4.62 (m, 1H), 4.51-4.47 (m, 1H), 4.40-4.36 (m, 1H), 3.97-3.97 (m, 8H), 2.44-2.40 (m, 1H), 1.98-1.91 (m, 2H), 1.80-1.74 (m, 2H), 1.67-1.56 (m, 2a), 1.46 (s, 9H), 1.43 (s, 9H), 1.29-12.7 (m, 6H) ppm.  $\delta_C$ (50 MHz, CDCl<sub>3</sub>) 202.3, 196.0, 155.1, 106.5, 106.1, 81.6, 80.6, 64.8, 64.3, 63.9, 63.8, 59.8, 58.7, 48.0, 47.4, 38.8, 37.6, 34.0, 32.3, 28.3, 28.2, 20.7, 18.7 ppm.  $m/z$  (CI) 286 (M+H)<sup>+</sup>.  $m/z$  (EI) 256.1558 (M-CHO, C<sub>13</sub>H<sub>22</sub>NO<sub>4</sub> requires 256.1549).

**(7R,9R)-tert-Butyl 7-allyl-9-methyl-1,4-dioxo-8-azaspiro[4.5]decane-8-carboxylate (8).**

From procedure B. Purification by column chromatography (SiO<sub>2</sub>; EtOAc / pentane 1:9) afforded compound **8** (95 mg, 64%) as a colorless oil. R<sub>f</sub> = 0.6.  $[\alpha]_D$  +27.4 (c 0.50 in CHCl<sub>3</sub>), 96% ee and dr > 99:1.  $\delta_H$ (400 MHz, CDCl<sub>3</sub>) 5.78-5.68 (m, 1H), 5.09-5.00 (m, 2H), 4.05-4.02 (m, 1H), 3.95-3.77 (m, 5H), 2.45-2.39 (m, 1H), 2.35-2.28 (m, 1H), 2.14 (dd,  $J$  = 14.7 Hz, 5.4 Hz, 1H), 1.98 (d,  $J$  = 4.1 Hz, 2H), 1.81 (dd,  $J$  = 14.7 Hz, 3.3 Hz, 1H), 1.44 (s, 9H), 1.25 (d,  $J$  = 6.8 Hz, 3H) ppm.  $\delta_C$ (50 MHz, CDCl<sub>3</sub>) 154.7, 135.5, 117.2, 106.3, 79.2, 63.8, 63.5, 50.6, 46.1, 39.6, 38.6, 34.8, 28.5, 20.8 ppm.  $m/z$  (CI) 298 (M+H)<sup>+</sup>.

**(7R,9R)-tert-Butyl-7-(4-chlorobutyl)-9-methyl-1,4-dioxo-8-azaspiro[4.5]decane-8-carboxylate (9).**

From procedure B. Purification by column chromatography (SiO<sub>2</sub>; EtOAc / pentane 1:9) afforded compound **9** (107 mg, 62%) as a colorless oil. R<sub>f</sub> = 0.5.  $[\alpha]_D$  +8.2 (c 0.49 in CHCl<sub>3</sub>), 96% ee and dr 99:1.  $\delta_H$ (400 MHz, CDCl<sub>3</sub>) 3.99-3.79 (m, 6H), 3.50 (t,  $J$  = 6.7 Hz, 2H), 2.10-1.98 (m, 2H), 1.93-1.89 (m, 1H), 1.79-1.71 (m, 3H), 1.70-1.52 (m, 2H), 1.47-1.31 (m, 2H), 1.42 (s, 9H), 1.24 (d,  $J$  = 6.9 Hz, 3H) ppm.  $\delta_C$ (50 MHz, CDCl<sub>3</sub>) 154.8, 106.5, 79.2, 63.8, 63.7, 50.5, 46.1, 44.9, 39.5, 35.7, 33.2, 32.3, 28.4, 23.9, 20.8 ppm.  $m/z$  (EI) 347.1847 (C<sub>17</sub>H<sub>30</sub>NO<sub>4</sub><sup>35</sup>Cl requires 347.1863).

**(4R,9aR)-4-Methylhexahydro-1H-quinolizin-2(6H)-one. (+)-Myrtine. (1).<sup>5</sup>**

Compound **9** (100 mg, 0.29 mmol) was refluxed in a mixture of acetone (3 mL) and H<sub>2</sub>O (0.5 mL) to which conc. HCl (1 mL) had been added. After 16 h the reaction mixture was cooled to 0 °C in an ice bath and the pH was increased by slowly adding NaHCO<sub>3</sub>. The reaction mixture was stirred at rt for an additional 16 h and then poured in H<sub>2</sub>O (10 mL). The aqueous layer was extracted with Et<sub>2</sub>O (3 × 10 mL) and the combined organic extracts were washed with brine, dried over Na<sub>2</sub>SO<sub>4</sub> and concentrated *in vacuo*. Purification by column chromatography (SiO<sub>2</sub>; EtOAc / pentane 2:8) afforded compound **1** (23 mg, 50%) as a yellow oil. R<sub>f</sub> = 0.7.  $[\alpha]_D$  +10.2 (c 1.77 in CHCl<sub>3</sub>), 96% ee and dr 97:3; lit.<sup>5a</sup>  $[\alpha]_D^{28}$  +11.3 (c 2.7 in CHCl<sub>3</sub>). Spectroscopic data correspond to the literature.<sup>5b</sup>  $\delta_H$ (400 MHz, CDCl<sub>3</sub>) 3.40-3.33 (m, 1H), 2.83 (dd,  $J$  = 13.4 Hz, 5.9 Hz, 1H), 2.80-2.75 (m, 1H), 2.67-2.60 (m, 1H), 2.46 (dt,  $J$  = 11.5 Hz, 2.8 Hz, 1H), 2.27-2.15 (m, 3H), 1.71-1.55 (m, 2a), 1.31-1.18 (m, 2H), 0.95 (t,  $J$  = 6.8 Hz, 3H) ppm.  $\delta_C$ (50 MHz, CDCl<sub>3</sub>) 209.5, 57.1, 53.5, 51.4, 48.6, 48.0, 34.2, 25.8, 23.4, 11.0 ppm.  $m/z$  (CI) 168 (M+H)<sup>+</sup>.

<sup>1</sup> R. Šebesta, M. G. Pizzuti, A. J. Boersma, A. J. Minnaard and B. L. Feringa, *Chem. Commun.*, 2005, 1711.

<sup>2</sup> H. C. Brown, B. Nazer and J. A. Sikorski, *Organometallics*, 1983, **2**, 634.

<sup>3</sup> P. Beak and W.-K. Lee, *J. Org. Chem.*, 1990, **55**, 2578.

<sup>4</sup> M. Berkheij, L. van der Sluis, C. Sewing, D. J. den Boer, J. W. Terpstra, H. Hiemstra, W. I. Iwema Bakker, A. van den Hoogenband and J. H. van Maarseveen, *Tetrahedron Lett.*, 2005, **46**, 2369.

---

<sup>5</sup> a) P. Slosse and C. Hootele, *Tetrahedron*, 1981, **37**, 4287. b) T. G. Back, M. D. Hamilton, V. J. J. Lim and M. Parvez, *J. Org. Chem.*, 2005, **70**, 967.
